# MIND TO MIND

*Creative writing that explores the abstract side  
of our profession and our lives*

Stephen T. Harvey, M.D., Editor

## Three Years after Their Vows

Lucinda D. Lawson, B.A.

H  
he comes home late  
again, says  
they need some time  
apart. She twists her dishrag  
deeper, and their last  
wedding tumbler  
snaps. Glass digs into  
flesh, and fire  
tears along her knuckle bone, bares  
nerve and tendon to the stinging air.  
She wraps it tight  
in dishtowels and hopes  
it holds together  
on its own. Only  
when the bleeding doesn't  
slow will she allow  
it to be numbed,  
the passage

---

Carol Wiley Cassella, M.D., served as Handling Editor for this submission.

From Missouri State University, Hartville, Missouri. lucindyl@hotmail.com

Accepted for publication March 9, 2016.

*Permission to reprint granted to the American Society of Anesthesiologists, Inc., and Wolters Kluwer Health, Inc., by copyright author/owner.*  
Anesthesiology 2016; 125:1066-7

of a dark and heavy thread.  
At night, her husband

takes her hand, unwinds  
the bandages and lays

the joint splint aside.  
What's left

is pain and stitches  
pulling like their promise, taut

against the separation, drawing  
ragged edges

side to side  
to heal the best they can.
